1 **Resistance to Ceftazidime/Avibactam Plus Meropenem/Vaborbactam When Both are**  
2 **Used Together Achieved in Four Steps From Metallo- $\beta$ -Lactamase Negative *Klebsiella***  
3 ***pneumoniae*.**

4

5

6 **Punyawee Dulyayangkul<sup>a</sup>, Edward J. A. Douglas<sup>a</sup>, Filip Lastovka<sup>a</sup>, Matthew B.**  
7 **Avison<sup>a#</sup>**

8

9 **<sup>a</sup>School of Cellular & Molecular Medicine, University of Bristol, Bristol. UK**

10

11 **E.J.A.D and P.D. contributed equally to this work.**

12 **P.D. finished the work for publication and so is named as first author.**

13

14 **#Address correspondence to: Matthew B. Avison. [bimba@bris.ac.uk](mailto:bimba@bris.ac.uk)**

15

16

17 **Running Title: Dual VAB/MER AVI/CAZ Resistance in *K. pneumoniae***

18

19 **Abstract**

20 **Serine cephalosporinases and carbapenemases are dominant causes of critically**  
21 **important  $\beta$ -lactam resistance in *Klebsiella pneumoniae*. This has led to the recent**  
22 **clinical deployment of new serine  $\beta$ -lactamase inhibitors used in combination with  $\beta$ -**  
23 **lactams. Starting with clinical *K. pneumoniae* isolates and adding plasmids carrying**  
24 **the OXA-48-like class D carbapenemase, OXA-232, the class A carbapenemase KPC-3,**  
25 **the class A cephalosporinase CTX-M-14 and mutant derivatives of these enzymes, we**  
26 **set out to identify the steps required to give resistance to the recently approved  $\beta$ -**  
27 **lactam/ $\beta$ -lactamase inhibitor pairs ceftazidime/avibactam and**  
28 **meropenem/vaborbactam when both are used together. We show that four steps:**  
29 ***ompK36* and *ramR* loss-of-function plus carriage of OXA-232 and KPC-3-D178Y, all of**  
30 **which have been observed in clinical isolates, allow *K. pneumoniae* to resist the**  
31 **combined use of both  $\beta$ -lactam/ $\beta$ -lactamase inhibitor pairs. These findings have**  
32 **implications for decision making about sequential and combinatorial use of  $\beta$ -**  
33 **lactam/ $\beta$ -lactamase inhibitor pairs to treat *K. pneumoniae* infections, and suggest**  
34 **simple surveillance activities that might identify intermediate stages in resistance**  
35 **acquisition and therefore guide therapy to reduce the emergence of dual resistant**  
36 **strains.**

## 37 Introduction

38 Cephalosporin- and carbapenem-resistant *Klebsiella pneumoniae* are critically important  
39 pathogens (1). *K. pneumoniae* can become resistant to a variety of antimicrobials by  
40 increased production of two RND efflux pumps, AcrAB and OqxAB (2-5) or reduced  
41 production of two porins, OmpK35 and OmpK36 (6). *K. pneumoniae* can also acquire a wide  
42 range of serine  $\beta$ -lactamases (7) the most clinically significant of which are enzymes of the  
43 CTX-M (class A cephalosporinase [8]), KPC (class A carbapenemase/cephalosporinase [9])  
44 and the OXA-48-like (class D carbapenemase [10]) types.

45 In response to the rise of CTX-M and KPC, serine  $\beta$ -lactamase inhibitors have been  
46 developed. Avibactam contains a diazabicyclo-octane cyclic core (11) and is used in  
47 combination with the third-generation cephalosporin ceftazidime. In vitro, avibactam shows  
48 good activity against many class A (TEM-1, SHV-1, CTX-M and KPC), class C (AmpC) and  
49 even some class D (OXA-24 and OXA-48)  $\beta$ -lactamases (12,13). When used *in vivo*,  
50 ceftazidime/avibactam resistance has been seen to develop in KPC producers, caused by a  
51 series of point mutations in the *bla*<sub>KPC</sub> gene, for example resulting in D179Y or V239G  
52 substitutions in KPC (14,15). A similar mechanism of ceftazidime/avibactam resistance was  
53 seen in CTX-M producers, with mutations in *bla*<sub>CTX-M</sub>, for example leading to a P170S  
54 change, alone or in addition to T264I (16).

55 Vaborbactam is a cyclic boronate and is used in combination with the carbapenem  
56 meropenem (17). It has potent activity against class A carbapenemases including KPC. It  
57 has also been shown to have inhibitory activity against other class A (TEM, SHV and CTX-  
58 M) and class C (AmpC)  $\beta$ -lactamases, although to a lesser extent when compared to its  
59 activity against KPC (18). Meropenem/vaborbactam resistance has been observed due to  
60 loss of function mutations in *ompK36* and *ompK35* (18,19). Mutations in KPC that confer  
61 reduced vaborbactam inhibition have not yet been observed.

62 Given the appearance of *K. pneumoniae* clinical isolates and laboratory selected mutants  
63 that are resistant to meropenem/vaborbactam or ceftazidime/avibactam, there has been  
64 some discussion in the literature about whether a combination of both  $\beta$ -lactam/ $\beta$ -lactamase  
65 inhibitor

66 pairs given together would overcome isolates resistant to either, and to both when used  
67 separately (20,21). In the work reported here we identified the steps required to generate  
68 resistance to each  $\beta$ -lactam/ $\beta$ -lactamase inhibitor pair, both pairs when used separately, and  
69 both pairs when used together. To do this we started with *K. pneumoniae* clinical isolates  
70 susceptible to both meropenem and ceftazidime.

71

## 72 **Results and Discussion**

73 *Permeability mutations influencing Meropenem/Vaborbactam MICs in K. pneumoniae Ecl8*  
74 *carrying OXA-232 or KPC-3*

75 There are four main loss-of-function mutations that affect accumulation of antibacterial drugs  
76 in *K. pneumoniae* clinical isolates: loss of the transcriptional repressors OqxR (2,3) and  
77 RamR (4,5), and loss of the porins OmpK35 (22,23) and OmpK36 (24,25). Starting with a  
78 laboratory workhorse *K. pneumoniae* strain, Ecl8, we determined the influence of these  
79 mutations on meropenem MIC in the presence or absence of  $8 \mu\text{g.mL}^{-1}$  vaborbactam when  
80 the strains carried one of two carbapenemases commonly encountered in the clinic: the  
81 OXA-48-like enzyme OXA-232 (26) or the class A carbapenemase KPC-3 (15). OXA-232 is  
82 a relatively weak carbapenemase, and in our hands does not give meropenem resistance in  
83 this otherwise wild-type background (**Table 1**) as we saw in the same background when  
84 using OXA-48 (27). Each loss-of-function mutation conferred a 4-fold increase in  
85 meropenem MIC, but in no case was the mutant meropenem resistant. In the presence of  
86 vaborbactam, meropenem MIC only marginally reduced, which was expected because  
87 vaborbactam is a poor inhibitor of OXA-48-like enzymes (28). In contrast, KPC-3 is an

88 excellent carbapenemase and gives meropenem resistance even in this wild-type  
89 background (**Table 1**). All four loss-of-function mutations increased meropenem MICs, but  
90 only by one or two doubling dilutions. Vaborbactam is a strong inhibitor of KPC-3 (17), and  
91 meropenem susceptibility was restored in Ecl8 and all mutants producing this enzyme. The  
92 highest MIC was against the *ompK36* mutant, but it remained meropenem/vaborbactam  
93 susceptible. This was expected, since it has been shown that meropenem/vaborbactam  
94 resistance in derivatives of *K. pneumoniae* clinical isolates is primarily caused by *ompK36*  
95 loss in a background where *ompK35* has already been lost (19) and we have previously  
96 reported that Ecl8 actually produces more OmpK35 than clinical isolates (29).

97 *Generating derivatives of K. pneumoniae clinical isolates resistant to ceftazidime/avibactam*  
98 *or meropenem/vaborbactam but not both.*

99 *K. pneumoniae* clinical isolate KP21 produces low levels of OmpK35 (29). Experimentally, it  
100 has been shown that *ramR* loss of function downregulates OmpK35 production in *K.*  
101 *pneumoniae* (27) and KP21 carries a frameshift mutation in *ramR* (29) whilst whole genome  
102 sequencing confirmed that *ompK35* itself is wild type. We introduced a natural OXA-232  
103 plasmid into this isolate, and the MIC of meropenem in the presence of vaborbactam against  
104 KP21(pOXA-232) was 1  $\mu\text{g.mL}^{-1}$  (**Table 2**) which is below the resistance breakpoint and  
105 equivalent to our findings for Ecl8 *ramR*(pOXA-232) (**Table 1**). We next selected a  
106 spontaneous mutant of KP21(pOXA-232) which grew on 16  $\mu\text{g.mL}^{-1}$  meropenem in the  
107 presence of vaborbactam, and so it is resistant. Proteomics confirmed that this mutant, KP21  
108 M(pOXA-232), had undetectable OmpK36 porin levels, and whole genome sequencing  
109 identified a single mutation resulting in a stop at codon 125 in *ompK36*, explaining loss of the  
110 porin. The MICs of meropenem with or without vaborbactam against KP21  
111 M[*ompK36*](pOXA-232) and against the constructed mutant KP21 *ompK36*(pOXA-232) were  
112 256  $\mu\text{g.mL}^{-1}$  (**Table 2**). This shows that *ompK36* loss confers meropenem/vaborbactam  
113 resistance in *ramR* mutant *K. pneumoniae* clinical isolates (i.e. with reduced OmpK35 levels)

114 producing OXA-48-like enzymes. Loss-of-function mutations in *ompK35* are not necessary  
115 for this phenotype.

116 The meropenem/vaborbactam resistant KP21(pOXA-232) *ompK36* mutant derivatives  
117 remained susceptible to ceftazidime (**Table 2**) as expected since OXA-232 is a weak  
118 cephalosporinase (26). Also as expected, introduction of a low-copy-number vector carrying  
119 *bla*<sub>CTX-M-14</sub> alongside its native promoter into either KP21(pOXA-232), KP21 *ompK36*(pOXA-  
120 232) or KP21 M[*ompK36*](pOXA-232) conferred ceftazidime resistance. The derivatives  
121 remained ceftazidime susceptible in the presence of 4 µg.mL<sup>-1</sup> avibactam (**Table 2**) which is  
122 a potent inhibitor of CTX-M (11). Replacement of *bla*<sub>CTX-M-14</sub> with a gene encoding a variant  
123 associated with reduced ceftazidime/avibactam susceptibility, CTX-M-14-P170S (16) drove  
124 the ceftazidime MIC against KP21 *ompK36*(pOXA-232) and KP21 M[*ompK36*](pOXA-232) in  
125 the presence of avibactam up to 8 µg.mL<sup>-1</sup>, which is still susceptible, but only one doubling  
126 dilution below the breakpoint for resistance. Disruption of *ompK35* in KP21  
127 M[*ompK36*](pOXA-232)(pCTX-M-14-P170S) did not further increase the  
128 ceftazime/avibactam MIC, confirming that *ramR* loss-of-function phenotypically mimics  
129 *ompK35* loss-of-function in this regard (**Table 2**). Accordingly, it was not possible to generate  
130 derivatives resistant to both meropenem/vaborbactam and ceftazidime/avibactam using a  
131 CTX-M-14 variant associated with reduced susceptibility to ceftazidime/avibactam, even in a  
132 *ramR* plus *ompK36* double mutant background co-producing OXA-232.

133 Introduction of KPC-3 and its derivatives associated with reduced ceftazidime/avibactam  
134 susceptibility into KP21(pOXA-232) was also attempted. In this case, both KPC-3 derivatives  
135 tested (D178Y or V239G) conferred ceftazidime/avibactam resistance. The D178Y derivative  
136 did this at the expense of reducing meropenem MIC into the intermediate-resistant zone.  
137 Essentially, there is a trade-off between meropenem hydrolytic activity and reduced  
138 avibactam inhibition (or perhaps increased ceftazidime hydrolytic activity) as reported  
139 previously (14). The V239G mutant did not suffer from such a large drop in meropenem MIC,  
140 but neither S178Y or V239G significantly altered the ability of vaborbactam to inhibit KPC-3,

141 as confirmed because all KP21(pOXA-232) derivatives carrying these KPC-3 variants were  
142 meropenem/vaborbactam susceptible (**Table 2**). Accordingly, it was not possible to generate  
143 derivatives resistant to both meropenem/vaborbactam and ceftazidime/avibactam using  
144 KPC-3 variants associated with ceftazidime/avibactam resistance in a background having  
145 wild-type *ompK36*, even with co-production of OXA-232.

146

147 *Combining ramR loss, OXA-232, ompK36 loss and KPC-3-D178Y confers dual*  
148 *meropenem/vaborbactam plus ceftazidime/avibactam resistance in K. pneumoniae.*

149 The above observations left us with the hypothesis that adding a KPC-3 derivative  
150 associated with ceftazidime/avibactam resistance to a background where meropenem non-  
151 susceptibility is conferred by mutation of *ramR* (i.e. causing OmpK35 downregulation)  
152 *ompK36* loss and OXA-232 production would generate a derivative resistant to  
153 ceftazidime/avibactam and meropenem/vaborbactam when used separately. This proved to  
154 be correct. MICs of meropenem/vaborbactam and ceftazidime/avibactam were  $\geq 64 \mu\text{g.mL}^{-1}$   
155 against KP21 M[*ompK36*](pOXA-232) or KP21 *ompK36*(pOXA-232) carrying either the  
156 D178Y or V239G derivatives of KPC-3. Additional disruption of *ompK35* only marginally  
157 further increased MICs, again confirming that OmpK35 down-regulation caused by *ramR*  
158 loss-of-function gives essentially the same phenotype as *ompK35* loss-of-function (**Table 2**).

159 Despite our use of OXA-232-producing strains for this analysis, production of OXA-232 was  
160 not found to be essential for resistance to meropenem/vaborbactam and  
161 ceftazidime/avibactam, when used separately. After constructing KP21 *ompK36*(pKPC-3-  
162 D178Y) and KP21 *ompK36*(pKPC-3-V239G) – i.e. lacking OXA-232 – we found them to be  
163 resistant to both  $\beta$ -lactam/ $\beta$ -lactamase inhibitor pairs (**Table 2**). Another interesting finding  
164 from our analysis was that ceftazidime/avibactam and meropenem/vaborbactam resistance  
165 can be conferred in the presence of wild-type KPC-3 and OXA-232 in this *ramR* background  
166 also lacking *ompK36* (**Table 2**). Clinical *K. pneumoniae* isolates with *ompK35* and *ompK36*

167 loss-of-function mutations and elevated KPC-3 production have recently been identified that  
168 are resistant to ceftazidime/avibactam (30) which supports our conclusion that KPC  
169 mutations are not essential for resistance.

170 Finally, we wanted to test whether the two  $\beta$ -lactam/inhibitor pairs would work synergistically,  
171 to give hope of clinical efficacy for the double combination therapy that has been discussed  
172 as a possibility for clinical use in the literature (20,21). Checkerboard assays (**Figure**)  
173 confirmed that KP21 M[*ompK36*](pOXA-232) and KP21 *ompK36*(pOXA-232) carrying pCTX-  
174 M14-P170S, pKPC-3 or pKPC-3-V239G are all susceptible to meropenem ( $\text{MIC} \leq 8 \mu\text{g.mL}^{-1}$ )  
175 in the presence of vaborbactam plus ceftazidime/avibactam suggesting that combined  
176 therapy would still work. However, KP21 M[*ompK36*](pOXA-232) carrying pKPC-3-D178Y  
177 and KP21 *ompK36*(pOXA-232) carrying pKPC-3-D178Y were resistant to meropenem ( $\text{MIC}$   
178  $= 16 \mu\text{g.mL}^{-1}$ ) and ceftazidime ( $\text{MIC} \geq 64 \mu\text{g.mL}^{-1}$ ) in the presence of vaborbactam plus  
179 avibactam. Further disruption of *ompK35* did not alter this result, again confirming that *ramR*-  
180 loss-mediated OmpK35 downregulation (as seen in all KP21 derivatives [29]) mimics the  
181 phenotypic effect of *ompK35* loss.

182 We have, therefore, generated *K. pneumoniae* derivatives resistant to ceftazidime/avibactam  
183 plus meropenem/vaborbactam when both pairs are used together. This was achieved in four  
184 steps relative to wild-type (*ramR* loss-of-function, acquisition of OXA-232, *ompK36* loss-of-  
185 function, acquisition of KPC-3-D178Y) each replicating an event previously identified in  
186 clinical *K. pneumoniae* isolates. When we constructed a derivative of clinical isolate KP47  
187 (wild type for *ramR*) carrying OXA-232 and KPC-3-D178Y and with *ompK36* inactivated, the  
188 derivative was meropenem/vaborbactam and ceftazidime/avibactam resistant when the pairs  
189 were used separately (**Table 2**) but not when both pairs were used at the same time  
190 (**Figure**). This confirms that OmpK35 downregulation caused by *ramR* loss-of-function is  
191 necessary to confer this dual-resistant phenotype. When we constructed the derivative KP21  
192 *ompK36* carrying KPC-3-D178Y or KPC-3-V239G but without carriage of OXA-232 it was  
193 also resistant to both pairs when used separately (**Table 2**) but not resistant when the pairs



194 were used together (**Figure**). Therefore, production of an OXA-48 like enzyme is also  
195 necessary for dual resistance.

196 Overall, this work confirms the remarkable capacity of *K. pneumoniae* to acquire resistance  
197 to the latest combination therapies available in the clinic by layering resistance mechanisms.  
198 Essentially, one low frequency step (specific mutations in a gene) is needed for  
199 ceftazidime/avibactam resistance; three steps (two high frequency loss-of-function mutations  
200 and a gene acquisition event, whose frequency depends on many factors) are needed for  
201 meropenem/vaborbactam resistance. If one of the three steps is acquisition of a KPC  
202 associated with ceftazidime/avibactam resistance, then these three steps lead to resistance  
203 to both ceftazidime/avibactam and meropenem/vaborbactam when used separately; finally  
204 adding in an fourth step: acquisition of an OXA-48-like carbapenemase is all that is needed  
205 to give resistance to both  $\beta$ -lactam/ $\beta$ -lactamase inhibitor pairs when used together. Of  
206 course, the order that these steps occur does not affect the result. So, it would seem prudent  
207 to make every effort to identify, via molecular diagnostics, intermediate stages in this  
208 acquisition process, e.g. *ramR* or *ompK35* mutants carrying KPC or an OXA-48-like enzyme.  
209 It would also seem prudent not to rely on sequential use of  $\beta$ -lactam/ $\beta$ -lactamase inhibitor  
210 pairs, which might select for the dual-resistant phenotype observed here. In **table 3** we  
211 attempt to address the issue of how different starting genotypes influence the chances of  
212 obtaining derivatives with specific resistance phenotypes. Whilst the frequencies reported for  
213 plasmid transmission events will vary widely dependent on local plasmid ecology, we hope  
214 that this table stimulates discussion around clinical decision making to reduce the  
215 emergence of resistance at the site of infection or in the patient's gut flora. And will increase  
216 the desire to obtain relevant genotypic information about circulating bacterial populations,  
217 and even the ecology of resistant organisms in the patient's gut microbiome prior to  
218 choosing therapy.

219

220

## 221 **Experimental**

### 222 *Materials, bacterial isolates and plasmids*

223 Chemicals were from Sigma and growth media from Oxoid, unless otherwise stated.  
224 Meropenem was from Sequoia Research Products, vaborbactam and avibactam were from  
225 MedChemExpress. Strains used were *K. pneumoniae* Ecl8 (31) the TEM-1-producing *ramR*  
226 mutant (Arg44FS) clinical isolate KP21, the wild-type clinical isolate KP47 and the in vitro-  
227 selected Ecl8-derived *oqxR* (Tyr109STOP) or *ramR* (Thr124Pro) loss-of-function mutants  
228 (29). A plasmid carrying *bla*<sub>OXA-232</sub> (pOXA-232) was recovered from *K. pneumoniae* clinical  
229 isolate KP11 (29) using a Qiagen plasmid purification kit, with the plasmid then used to  
230 transform *E. coli* DH5 $\alpha$  to reduced piperacillin/tazobactam susceptibility (8  $\mu\text{g.mL}^{-1}$   
231 piperacillin and 4  $\mu\text{g.mL}^{-1}$  tazobactam) using electroporation. Recombinants were confirmed  
232 to be cefotaxime susceptible before the plasmid was re-purified and used to transform *K.*  
233 *pneumoniae* isolates. The *bla*<sub>OXA-232</sub>-encoding region was confirmed as being unchanged  
234 from the original using PCR sequencing.

235

### 236 *Selection and generation of mutants*

237 To select meropenem/vaborbactam resistant mutants, 100  $\mu\text{L}$  aliquots of overnight cultures  
238 of KP21 grown in Nutrient Broth (NB) were spread onto Mueller Hinton agar containing 16  
239  $\mu\text{g.mL}^{-1}$  meropenem in the presence of 8  $\mu\text{g.mL}^{-1}$  of vaborbactam, which were then  
240 incubated for 24 h. Insertional inactivation of *ompK35* or *ompK36* was performed using the  
241 pKNOCK suicide plasmid (32). The *ompK35* and *ompK36* DNA fragments were amplified  
242 with Phusion High-Fidelity DNA Polymerase (NEB, UK) from *K. pneumoniae* Ecl8 genomic  
243 DNA using primers *ompK35* KO FW (5'-TCCCAGACCACAAAAACCCG-3') and *ompK35* KO  
244 RV (5'-CCAGACCGAAGAAGTCGGAG-3'); *ompK36* KO FW (5'-  
245 CGTTCAGGCGAACAACACTG-3') and *ompK36* KO RV (5'-AAGTTCAGGCCGTCAACCAG-  
246 3'). Each PCR product was ligated into the pKNOCK-GM at the SmaI site. The recombinant

247 plasmid was then transferred into wild-type *K. pneumoniae* isolates by conjugation. Mutants  
248 were selected for gentamicin non-susceptibility ( $5 \mu\text{g.mL}^{-1}$ ) and the mutation was confirmed  
249 by PCR using primers *ompK35* full length FW (5'-CACTTCGATGTATTTAACCAG-3') and  
250 *ompK35* full length RV (5'-ATGATGAAGCGCAATATTCTG-3') *ompK36* full length FW (5'-  
251 GAGGCATCCGGTTGAAATAG-3') and *ompK36* full length RV (5'-  
252 ATTAATCGAGGCTCCTCTTAC-3').

253

#### 254 *Determining MICs of antimicrobials and checkerboard assays*

255 MICs were determined using CLSI broth microtiter assays (33) and interpreted using  
256 published breakpoints (34). Checkerboard assays were performed using an adapted  
257 microtiter MIC assay. Briefly, a PBS bacterial suspension was prepared to obtain a stock of  
258  $\text{OD}_{600}=0.01$ . The final volume in each well of a 96-well cell culture plate (Corning Costar)  
259 was 200  $\mu\text{L}$  and included 20  $\mu\text{L}$  of the bacterial suspension. All wells contained Cation  
260 Adjusted Muller Hinton broth (CA-MHB) with avibactam ( $4 \mu\text{g.mL}^{-1}$ ) and vaborbactam ( $8$   
261  $\mu\text{g.mL}^{-1}$ ) with a serial dilution of meropenem from right to left and ceftazidime from the  
262 bottom to the top of the plate. Bacterial growth was determined after 20 h of incubation by  
263 measuring optical density at 600 nm ( $\text{OD}_{600}$ ) using a POLARstar Omega spectrophotometer  
264 (BMG Labtech).

265

#### 266 *Proteomics*

267 Five hundred microlitres of an overnight CA-MHB culture were transferred to 50 mL CA-MHB  
268 and cells were grown at  $37^{\circ}\text{C}$  to 0.6  $\text{OD}_{600}$ . Cells were pelleted by centrifugation (10 min,  
269  $4,000 \times g$ ,  $4^{\circ}\text{C}$ ) and resuspended in 20 mL of 30 mM Tris-HCl, pH 8 and broken by  
270 sonication using a cycle of 1 s on, 0.5 s off for 3 min at an amplitude of 63% using a Sonics  
271 Vibracell VC-505TM (Sonics and Materials Inc., Newton, Connecticut, USA). The sonicated  
272 samples were centrifuged at 8,000 rpm (Sorval RC5B PLUS using an SS-34 rotor) for 15

273 min at 4°C to pellet intact cells and large cell debris. For envelope preparations, the  
274 supernatant was subjected to centrifugation at 20,000 rpm for 60 min at 4°C using the above  
275 rotor to pellet total envelopes. To isolate total envelope proteins, this total envelope pellet  
276 was solubilized using 200 µL of 30 mM Tris-HCl, pH 8 containing 0.5% (w/v) SDS.

277 Protein concentrations in all samples were quantified using Biorad Protein Assay Dye  
278 Reagent Concentrate according to the manufacturer's instructions. Proteins (5 µg/lane for  
279 envelope protein analysis) were separated by SDS-PAGE using 11% acrylamide, 0.5% bis-  
280 acrylamide (Biorad) gels and a Biorad Min-Protein Tetracell chamber model 3000X1. Gels  
281 were resolved at 200 V until the dye front moved approximately 1 cm into the separating gel.  
282 Proteins in all gels were stained with Instant Blue (Expedeon) for 20 min and de-stained in  
283 water.

284 The 1 cm of gel lane was subjected to in-gel tryptic digestion using a DigestPro automated  
285 digestion unit (Intavis Ltd). The resulting peptides from each gel fragment were fractionated  
286 separately using an Ultimate 3000 nanoHPLC system in line with an LTQ-Orbitrap Velos  
287 mass spectrometer (Thermo Scientific). In brief, peptides in 1% (v/v) formic acid were  
288 injected onto an Acclaim PepMap C18 nano-trap column (Thermo Scientific). After washing  
289 with 0.5% (v/v) acetonitrile plus 0.1% (v/v) formic acid, peptides were resolved on a 250 mm  
290 x 75 µm Acclaim PepMap C18 reverse phase analytical column (Thermo Scientific) over a  
291 150 min organic gradient using 7 gradient segments (1-6% solvent B over 1 min, 6-15% B  
292 over 58 min, 15-32% B over 58 min, 32-40% B over 5 min, 40-90% B over 1 min, held at  
293 90% B for 6 min and then reduced to 1% B over 1 min) with a flow rate of 300 nL/min.  
294 Solvent A was 0.1% formic acid and Solvent B was aqueous 80% acetonitrile in 0.1% formic  
295 acid. Peptides were ionized by nano-electrospray ionization MS at 2.1 kV using a stainless-  
296 steel emitter with an internal diameter of 30 µm (Thermo Scientific) and a capillary  
297 temperature of 250°C. Tandem mass spectra were acquired using an LTQ-Orbitrap Velos  
298 mass spectrometer controlled by Xcalibur 2.1 software (Thermo Scientific) and operated in  
299 data-dependent acquisition mode. The Orbitrap was set to analyse the survey scans at

300 60,000 resolution (at  $m/z$  400) in the mass range  $m/z$  300 to 2000 and the top twenty  
301 multiply charged ions in each duty cycle selected for MS/MS in the LTQ linear ion trap.  
302 Charge state filtering, where unassigned precursor ions were not selected for fragmentation,  
303 and dynamic exclusion (repeat count 1; repeat duration 30 s; exclusion list size 500) were  
304 used. Fragmentation conditions in the LTQ were as follows: normalized collision energy of  
305 40%; activation  $q$  0.25; activation time 10 ms; and minimum ion selection intensity 500  
306 counts.

307 The raw data files were processed and quantified using Proteome Discoverer software v1.4  
308 (Thermo Scientific) and searched against the UniProt *K. pneumoniae* strain ATCC 700721 /  
309 MGH 78578 database (5126 protein entries; UniProt accession 272620) using the  
310 SEQUEST (Ver. 28 Rev. 13) algorithm. Peptide precursor mass tolerance was set to 10  
311 ppm, and MS/MS tolerance was set to 0.8 Da. Search criteria included  
312 carbamidomethylation of cysteine (+57.0214) as a fixed modification and oxidation of  
313 methionine (+15.9949) as a variable modification. Searches were performed with full tryptic  
314 digestion and a maximum of 1 missed cleavage was allowed. The reverse database search  
315 option was enabled and all peptide data was filtered to satisfy false discovery rate (FDR) of 5  
316 %. The Proteome Discoverer software generates a reverse “decoy” database from the same  
317 protein database used for the analysis and any peptides passing the initial filtering  
318 parameters that were derived from this decoy database are defined as false positive  
319 identifications. The minimum cross-correlation factor filter was readjusted for each individual  
320 charge state separately to optimally meet the predetermined target FDR of 5 % based on the  
321 number of random false positive matches from the reverse decoy database. Thus, each data  
322 set has its own passing parameters. Protein abundance measurements were calculated from  
323 peptide peak areas using the Top 3 method (35) and proteins with fewer than three peptides  
324 identified were excluded. The proteomic analysis was repeated three times for each parent  
325 and mutant strain, each using a separate batch of cells.

326

327

328

329 *Whole genome sequencing to Identify mutations*

330 Whole genome resequencing was performed by MicrobesNG (Birmingham, UK) on a HiSeq  
331 2500 instrument (Illumina, San Diego, CA, USA). Reads were trimmed using Trimmomatic  
332 (36) and assembled into contigs using SPAdes 3.10.1 (<http://cab.spbu.ru/software/spades/>).  
333 Assembled contigs were mapped to the *K. pneumoniae* Ecl8 reference genome (GenBank  
334 accession number GCF\_000315385.1) by using progressive Mauve alignment software (37).

335

336 *Cloning bla<sub>CTX-M-14</sub> and bla<sub>KPC-3</sub> and site-directed mutagenesis*

337 *bla<sub>CTX-M-14</sub>* was amplified from a human urinary *E. coli* isolated from primary care (38) by PCR  
338 with Phusion High-Fidelity DNA Polymerase (NEB, UK) using primers CTX-M-14 FW (5'-  
339 CCGGAATTC AATACTACCTTGCTTTCTGA-3') and CTX-M-14 RV (5'-  
340 CCGGAATTC CGTAGCGGAACGTTTCATCAG-3') and ligated into pUBYT (39) at the EcoRI  
341 site. CTX-M-14 site-directed mutagenesis (*bla<sub>CTX-M-14-P170S</sub>*) was performed using the  
342 QuikChange Lightning Site-Directed Mutagenesis Kit (Agilent, USA) with the primer CTX-M-  
343 14-P170S-FW (5'-TCTGGATCGCACTGAATCTACGCTGAATACCGC-3').

344 *bla<sub>KPC-3</sub>* was amplified from pKpQIL isolated from *K. pneumoniae* KP30 (29) as above using  
345 primers KPC-3 FW (5'- CCGGAATTCGTAAAGTGGGTCAGTTTTTCAG-3') and KPC-3 RV  
346 (5'- GGCTCTGAAAATCATCTATTGGAATTCGG-3') and ligated into pUBYT at the EcoRI  
347 site. KPC-3 site-directed mutagenesis (*bla<sub>KPC-3-D178Y</sub>* and *bla<sub>KPC-3-V239G</sub>*) was performed using a  
348 two-step, PCR-based site-directed mutagenesis strategy. *bla<sub>KPC-3-D178Y</sub>* was constructed  
349 using primers KPC-3-D178Y-FW (5'-AGGCGATGCGCGCTATACCTCATCGCC-3') and  
350 KPC-3-D178Y-RV (5'- GGCGATGAGGTATAGCGCGCATCGCCT-3'); *bla<sub>KPC-3-V239G</sub>* was  
351 constructed using primers KPC-3-V239G-FW (5'-

352 GGAACCTGCGGAGGGTATGGCACGGCA-3') and KPC-3-V239G-RV (5'-  
353 TGCCGTGCCATACCCTCCGCAGGTTCC-3'). Carriage of all pUBYT plasmids was selected  
354 using kanamycin (30 µg.mL<sup>-1</sup>)

355

### 356 **Acknowledgments**

357 This work was funded by grant MR/S004769/1 to M.B.A. from the Antimicrobial Resistance  
358 Cross Council Initiative supported by the seven United Kingdom research councils and the  
359 National Institute for Health Research. Additional funding came via a bequest from the estate  
360 of the late Professor Graham Ayliffe. Genome sequencing was provided by MicrobesNG  
361 (<http://www.microbesng.uk/>), which is supported by the BBSRC (grant number  
362 BB/L024209/1). We are grateful to Dr Kate Heesom, School of Biochemistry, University of  
363 Bristol, for performing the proteomics analysis and to Dr Jacqueline Findlay, School of  
364 Cellular & Molecular Medicine, for purifying pOXA-232.

365

366 **We declare no conflicts of interest.**

367 **Figure Legend**

368

369 **Figure. Checkerboard assays for ceftazidime and meropenem in the presence of**  
370 **avibactam and vaborbactam.**

371 Each image represents duplicate assays for an 8x8 array of wells in a 96-well plate. All wells  
372 contained CA-MHB including avibactam ( $4 \mu\text{g.mL}^{-1}$ ) and vaborbactam ( $8 \mu\text{g.mL}^{-1}$ ). A serial  
373 dilution of meropenem (MEM, x-axis) and ceftazidime (CAZ, y-axis) was created from 32  
374  $\mu\text{g.mL}^{-1}$  in each plate as recorded. All wells were inoculated with a suspension of bacteria,  
375 made as per CLSI microtiter MIC guidelines (33), and the plate was incubated at 37°C for 20  
376 h. Growth was recorded by measuring OD<sub>600</sub> and growth above background (broth) is  
377 recorded as a yellow block. Growth at  $8 \mu\text{g.mL}^{-1}$  ceftazidime and  $8 \mu\text{g.mL}^{-1}$  meropenem (this  
378 position indicated in red) in the presence of vaborbactam and avibactam defines resistance  
379 based on CLSI breakpoints (34). Bacterial suspensions used were: for images in the top  
380 row, KP21[*ramR*] *ompK36*; second row, KP21[*ramR*] *ompK36*(pOXA-232); third row,  
381 KP21[*ramR*] M[*ompK36*](pOXA-232); fourth row, KP21[*ramR*] M[*ompK36*] *ompK35*(pOXA-  
382 232); fifth row, KP47 *ompK36*(pOXA-232). In each case, bacteria also carry the following  
383 plasmids (where tested): images in first column, pCTX-M-14 P170S; second column, pKPC-  
384 3; third column, pKPC-3-D178Y; fourth column, pKPC-3-V239G.

385



386 **Tables**

387 **Table 1. MICs ( $\mu\text{g}\cdot\text{mL}^{-1}$ ) of meropenem with or without vaborbactam against *K.***  
388 ***pneumoniae* Ecl8 derivatives.**

|                                     | <b>Meropenem</b> | <b>Meropenem/Vaborbactam</b> |
|-------------------------------------|------------------|------------------------------|
| <b>Ecl8(pOXA-232)</b>               | 0.125            | 0.125/8                      |
| <b>Ecl8 <i>ompK35</i>(pOXA-232)</b> | 1                | 0.5/8                        |
| <b>Ecl8 <i>ompK36</i>(pOXA-232)</b> | 1                | 1/8                          |
| <b>Ecl8 <i>ramR</i>(pOXA-232)</b>   | 1                | 0.5/8                        |
| <b>Ecl8 <i>oqxR</i>(pOXA-232)</b>   | 1                | 0.5/8                        |
| <b>Ecl8(pKPC-3)</b>                 | 64               | 0.125/8                      |
| <b>Ecl8 <i>ompK35</i>(pKPC-3)</b>   | 128              | 0.125/8                      |
| <b>Ecl8 <i>ompK36</i>(pKPC-3)</b>   | 256              | 2/8                          |
| <b>Ecl8 <i>ramR</i>(pKPC-3)</b>     | 128              | 0.125/8                      |
| <b>Ecl8 <i>oqxR</i>(pKPC-3)</b>     | 128              | 0.125/8                      |

389

390 Shading indicates resistance according to CLSI breakpoints (34).

391 **Table 2. MICs ( $\mu\text{g}\cdot\text{mL}^{-1}$ ) of meropenem with or without vaborbactam and of ceftazidime**  
 392 **with or without avibactam against derivatives of *K. pneumoniae* clinical isolates.**

|                                                               | Meropenem | Meropenem/<br>Vaborbactam | Ceftazidime | Ceftazidime/<br>Avibactam |
|---------------------------------------------------------------|-----------|---------------------------|-------------|---------------------------|
| KP21[ <i>ramR</i> ](pOXA-232)(pUBYT)                          | 1         | 1/8                       | 2           | 0.5/4                     |
| KP21[ <i>ramR</i> ] pOXA-232)(pCTX-M-14)                      | 1         | 1/8                       | 32          | 1/4                       |
| KP21[ <i>ramR</i> ] pOXA-232)(pCTX-M-14 P170S)                | 1         | 1/8                       | 256         | 4/4                       |
| KP21[ <i>ramR</i> ](pOXA-232)(pKPC-3)                         | 128       | 2/8                       | >256        | 8/4                       |
| KP21[ <i>ramR</i> ](pOXA-232)(pKPC-3-D178Y)                   | 2         | 2/8                       | >256        | 256/4                     |
| KP21[ <i>ramR</i> ](pOXA-232)(pKPC-3-V239G)                   | 64        | 4/8                       | >256        | 128/4                     |
| KP21[ <i>ramR</i> ] <i>ompK35</i> (pOXA-232)(pUBYT)           | 4         | 4/8                       | 2           | 0.5/4                     |
| KP21[ <i>ramR</i> ] <i>ompK35</i> (pOXA-232)(pCTX-M-14)       | 4         | 4/8                       | 32          | 1/4                       |
| KP21[ <i>ramR</i> ] <i>ompK35</i> (pOXA-232)(pCTX-M-14 P170S) | 2         | 2/8                       | >256        | 4/4                       |
| KP21[ <i>ramR</i> ] <i>ompK35</i> (pOXA-232)(pKPC-3)          | 128       | 1/8                       | >256        | 0.125/4                   |
| KP21[ <i>ramR</i> ] <i>ompK35</i> (pOXA-232)(pKPC-3-D178Y)    | 4         | 4/8                       | >256        | 128/4                     |
| KP21[ <i>ramR</i> ] <i>ompK35</i> (pOXA-232)(pKPC-3-V239G)    | 64        | 4/8                       | >256        | 32/4                      |
| KP21[ <i>ramR</i> ] <i>ompK36</i> (pOXA-232)(pUBYT)           | 256       | 256/8                     | 2           | 0.5/4                     |
| KP21[ <i>ramR</i> ] <i>ompK36</i> (pOXA-232)(pCTX-M-14)       | 256       | 256/8                     | 32          | 1/4                       |
| KP21[ <i>ramR</i> ] <i>ompK36</i> (pOXA-232)(pCTX-M-14 P170S) | 256       | 256/8                     | >256        | 8/4                       |
| KP21[ <i>ramR</i> ] <i>ompK36</i> (pOXA-232)(pCTX-M-14 P170S) | >256      | 256/8                     | >256        | 16/4                      |

|                                                                |      |       |      |        |
|----------------------------------------------------------------|------|-------|------|--------|
| 232)(pKPC-3)                                                   |      |       |      |        |
| KP21[ <i>ramR</i> ] <i>ompK36</i> (pOXA-232)(pKPC-3-D178Y)     | 256  | 256/8 | >256 | >256/4 |
| KP21[ <i>ramR</i> ] <i>ompK36</i> (pOXA-232)(pKPC-3-V239G)     | >256 | 256/8 | >256 | 128/4  |
| KP21[ <i>ramR</i> ] <i>ompK36</i> (pKPC-3)                     | >256 | 16/8  | >256 | 8/4    |
| KP21[ <i>ramR</i> ] <i>ompK36</i> (pKPC-3-D178Y)               | 64   | 16/8  | >256 | 256/4  |
| KP21[ <i>ramR</i> ] <i>ompK36</i> (pKPC-3-V239G)               | >256 | 32/8  | >256 | 256/4  |
| KP21 M[ <i>ramR ompK36</i> ](pOXA-232)(pUBYT)                  | 256  | 256/8 | 2    | 1/4    |
| KP21 M[ <i>ramR ompK36</i> ](pOXA-232)(pCTX-M-14)              | 128  | 128/8 | 32   | 1/4    |
| KP21 M[ <i>ramR ompK36</i> ](pOXA-232)(pCTX-M-14 P170S)        | 256  | 128/8 | >256 | 8/4    |
| KP21 M[ <i>ramR ompK36</i> ](pOXA-232)(pKPC-3)                 | >256 | 256/8 | >256 | 8/4    |
| KP21 M[ <i>ramR ompK36</i> ](pOXA-232)(pKPC-3-D178Y)           | 128  | 128/8 | >256 | 256/4  |
| KP21 M[ <i>ramR ompK36</i> ](pOXA-232)(pKPC-3-V239G)           | >256 | 256/8 | >256 | 64/4   |
| KP21 M[ <i>ramR ompK36 ompK35</i> ](pOXA-232)(pUBYT)           | 256  | 256/8 | 2    | 1/4    |
| KP21 M[ <i>ramR ompK36 ompK35</i> ](pOXA-232)(pCTX-M-14)       | 256  | 256/8 | 32   | 1/4    |
| KP21 M[ <i>ramR ompK36 ompK35</i> ](pOXA-232)(pCTX-M-14 P170S) | 256  | 256/8 | 256  | 8/4    |
| KP21 M[ <i>ramR ompK36 ompK35</i> ](pOXA-232)(pKPC-3)          | >256 | 256/8 | >256 | 16/4   |
| KP21 M[ <i>ramR ompK36</i> ]                                   | 256  | 256/8 | >256 | >256/4 |

|                                                                             |      |       |      |        |
|-----------------------------------------------------------------------------|------|-------|------|--------|
| <b><i>ompK35</i>(pOXA-232)(pKPC-3-D178Y)</b>                                |      |       |      |        |
| <b>KP21 M[<i>ramR ompK36</i>]<br/><i>ompK35</i>(pOXA-232)(pKPC-3-V239G)</b> | >256 | 256/8 | >256 | 128/4  |
| <b>KP47 <i>ompK36</i>(pKPC-3)</b>                                           | >256 | 2/8   | >256 | 8/4    |
| <b>KP47 <i>ompK36</i>(pKPC-3-D178Y)</b>                                     | 8    | 2/8   | >256 | 256/4  |
| <b>KP47 <i>ompK36</i>(pOXA-232)(pKPC-3)</b>                                 | >256 | 16/8  | >256 | 16/4   |
| <b>KP47 <i>ompK36</i>(pOXA-232)(pKPC-3-D178Y)</b>                           | 16   | 16/8  | >256 | >256/4 |

393 Shading indicates non-susceptibility (resistance or intermediate resistance) according to

394 CLSI breakpoints (34).

395 **Table 3 Rough relative estimates for risk of acquiring resistance to  $\beta$ -lactam/ $\beta$ -lactamase inhibitor pairs, singularly or in combination**  
 396 **based on starting genotype.**

| Phenotype >                   | MER/VAB                                  | AVI/CAZ                                                    | MER/VAB and AVI/CAZ separately                                                    | MER/VAB and AVI/CAZ together                               |
|-------------------------------|------------------------------------------|------------------------------------------------------------|-----------------------------------------------------------------------------------|------------------------------------------------------------|
| <b>Genotype Needed &gt;</b>   | <i>ramR/ompK35+ompK36+KPC/OXA-232</i>    | KPC-MUT <b>or</b><br><i>ramR/ompK35+ompK36+KPC+OXA-232</i> | <i>ramR/ompK35+ompK36+KPC+OXA-232</i> <b>or</b> <i>ramR/ompK35+ompK36+KPC-MUT</i> | <i>ramR/ompK35+ompK36+KPC-MUT+OXA-232</i>                  |
| <b>Actual Genotype</b>        | <b>Needed (est. frequency)</b>           | <b>Needed (est. frequency)</b>                             | <b>Needed (est. frequency)</b>                                                    | <b>Needed (est. frequency)</b>                             |
| WT+KPC                        | <i>ramR/ompK35+OmpK36</i> ( $10^{-14}$ ) | KPC-MUT ( $10^{-9}$ )                                      | <i>ramR/ompK35+ompK36+KPC-MUT</i> ( $10^{-23}$ )                                  | <i>ramR/ompK35+ompK36+KPC-MUT+OXA-232</i> ( $10^{-33}$ )** |
|                               |                                          | <i>ramR/ompK35+ompK36+OXA-232</i> ( $10^{-23}$ )**         | <i>ramR/ompK35+ompK36+OXA-232</i> ( $10^{-23}$ )**                                | <i>ramR+ompK36+KPC-MUT+OXA-232</i> ( $10^{-33}$ )**        |
| <i>ramR/ompK35+KPC</i>        | <i>ompK36</i> ( $10^{-7}$ )              | KPC-MUT ( $10^{-9}$ )                                      | <i>ompK36+KPC-MUT</i> ( $10^{-16}$ )                                              | <i>ompK36+KPC-MUT+OXA-232</i> ( $10^{-26}$ )**             |
|                               |                                          | <i>ompK36+OXA-232</i> ( $10^{-16}$ )**                     | <i>ompK36+OXA-232</i> ( $10^{-16}$ )**                                            | <i>ompK36+KPC-MUT+OXA-232</i> ( $10^{-26}$ )**             |
| <i>ompK36+KPC</i>             | <i>ramR/ompK35</i> ( $10^{-7}$ )         | KPC-MUT ( $10^{-9}$ )                                      | <i>ramR/ompK35+KPC-MUT</i> ( $10^{-16}$ )                                         | <i>ramR/ompK35+KPC-MUT+OXA-232</i> ( $10^{-26}$ )**        |
|                               |                                          | <i>ramR/ompK35+OXA-232</i> ( $10^{-16}$ )**                | <i>ramR/ompK35+OXA-232</i> ( $10^{-16}$ )**                                       | <i>ompK36+KPC-MUT+OXA-232</i> ( $10^{-26}$ )**             |
| WT+KPC-MUT                    | <i>ramR/ompK35+OmpK36</i> ( $10^{-14}$ ) | --                                                         | <i>ramR/ompK35+OmpK36</i> ( $10^{-14}$ )                                          | <i>ramR/ompK35+OmpK36+OXA-232</i> ( $10^{-24}$ )**         |
| <i>ramR/ompK35+KPC-MUT</i>    | <i>ompK36</i> ( $10^{-7}$ )              | --                                                         | <i>ompK36</i> ( $10^{-7}$ )                                                       | <i>ompK36+OXA-232</i> ( $10^{-17}$ )**                     |
| <i>ompK36+KPC-MUT</i>         | <i>ramR/ompK35</i> ( $10^{-7}$ )         | --                                                         | <i>ramR/ompK35</i> ( $10^{-7}$ )                                                  | <i>ramR/ompK35+OXA-232</i> ( $10^{-17}$ )**                |
| <i>ramR/ompK35+ompK36+KPC</i> | --                                       | KPC-MUT ( $10^{-9}$ )                                      | KPC-MUT ( $10^{-9}$ )                                                             | KPC-MUT+OXA-232 ( $10^{-19}$ )**                           |
|                               |                                          | OXA-232 ( $10^{-10}$ )**                                   | OXA-232 ( $10^{-10}$ )**                                                          | KPC-MUT+OXA-232 ( $10^{-20}$ )**                           |
| WT+KPC+OXA-232                | <i>ramR/ompK35+OmpK36</i> ( $10^{-14}$ ) | KPC-MUT ( $10^{-9}$ )                                      | <i>ramR/ompK35+OmpK36+KPC-MUT</i> ( $10^{-23}$ )                                  | <i>ramR/ompK35+OmpK36+KPC-MUT</i> ( $10^{-23}$ )           |
|                               |                                          | <i>ramR/ompK35+OmpK36</i> ( $10^{-14}$ )                   | <i>ramR/ompK35+OmpK36</i> ( $10^{-14}$ )                                          | <i>ramR/ompK35+OmpK36+KPC-MUT</i> ( $10^{-23}$ )           |
| <i>ramR/ompK35+</i>           | <i>ompK36</i> ( $10^{-7}$ )              | KPC-MUT ( $10^{-9}$ )                                      | <i>ompK36+KPC-MUT</i> ( $10^{-16}$ )                                              | <i>ompK36+KPC-MUT</i> ( $10^{-16}$ )                       |

|                                     |                                          |                                  |                                            |                                            |
|-------------------------------------|------------------------------------------|----------------------------------|--------------------------------------------|--------------------------------------------|
| KPC+OXA-232                         |                                          |                                  |                                            |                                            |
|                                     |                                          | <i>ompK36</i> ( $10^{-7}$ )      | <i>ompK36</i> ( $10^{-7}$ )                | <i>ompK36</i> +KPC-MUT ( $10^{-16}$ )      |
| <i>ompK36</i> +KPC+OXA-232          | <i>ramR/ompK35</i> ( $10^{-7}$ )         | KPC-MUT ( $10^{-9}$ )            | <i>ramR/ompK35</i> +KPC-MUT ( $10^{-16}$ ) | <i>ramR/ompK35</i> +KPC-MUT ( $10^{-16}$ ) |
|                                     |                                          | <i>ramR/ompK35</i> ( $10^{-7}$ ) | <i>ramR/ompK35</i> ( $10^{-7}$ )           | <i>ramR/ompK35</i> +KPC-MUT ( $10^{-16}$ ) |
| WT+KPC-MUT+OXA-232                  | <i>ramR/ompK35+OmpK36</i> ( $10^{-14}$ ) | --                               | <i>ramR/ompK35+OmpK36</i> ( $10^{-14}$ )   | <i>ramR/ompK35+OmpK36</i> ( $10^{-14}$ )   |
| <i>ramR/ompK35</i> +KPC-MUT+OXA-232 | <i>ompK36</i> ( $10^{-7}$ )              | --                               | <i>ompK36</i> ( $10^{-7}$ )                | <i>ompK36</i> ( $10^{-7}$ )                |
| <i>ompK36</i> +KPC-MUT+OXA-232      | <i>ramR/ompK35</i> ( $10^{-7}$ )         | --                               | <i>ramR/ompK35</i> ( $10^{-7}$ )           | <i>ramR/ompK35</i> ( $10^{-7}$ )           |

397 \*\*The risk of plasmid transfer is impossible to assess. It will depend, amongst many other factors, on the transmissibility and abundance of the  
 398 plasmid that must be transferred. KPC plasmids of the pKpQIL type, in perfect laboratory conditions transfer at a frequency of  $10^{-6}$  to  $10^{-8}$   
 399 transconjugants per donor cell (40); IncL/M OXA-48 plasmids transfer is at a frequency of almost  $10^{-6}$  (41). So, in mixed populations, such as  
 400 might be seen in the gut microbiota, we have assessed the maximum possible transfer frequency as  $10^{-10}$  for each. Of course, if a patient is  
 401 clear of any plasmid-encoded KPC or OXA-48 producing bacteria, the observed transfer frequency for the genes encoding these enzymes will  
 402 be close to zero. Frequency of spontaneous resistance in KPC was equated with the observed mutation frequency ( $10^{-9}$ ) for streptomycin  
 403 resistance in *Escherichia coli*, since this represents a similarly specific set of mutations (42). A mutator phenotype could increase this by two  
 404 orders of magnitude (43). We set the frequency of loss-of-function mutation (*ramR*, *ompK35* or *ompK36*) as 100-fold higher than the  
 405 spontaneous mutation frequency because of the number of possible mutations that could disrupt a gene, but this is likely to be a very  
 406 conservative estimate as previously described (44). Abbreviations: MER, meropenem, VAB, vaborbactam, CAZ, ceftazidime, AVI, avibactam,  
 407 KPC-MUT, KPC derivatives associated with AVI/CAZ resistance.

408 **Figure**

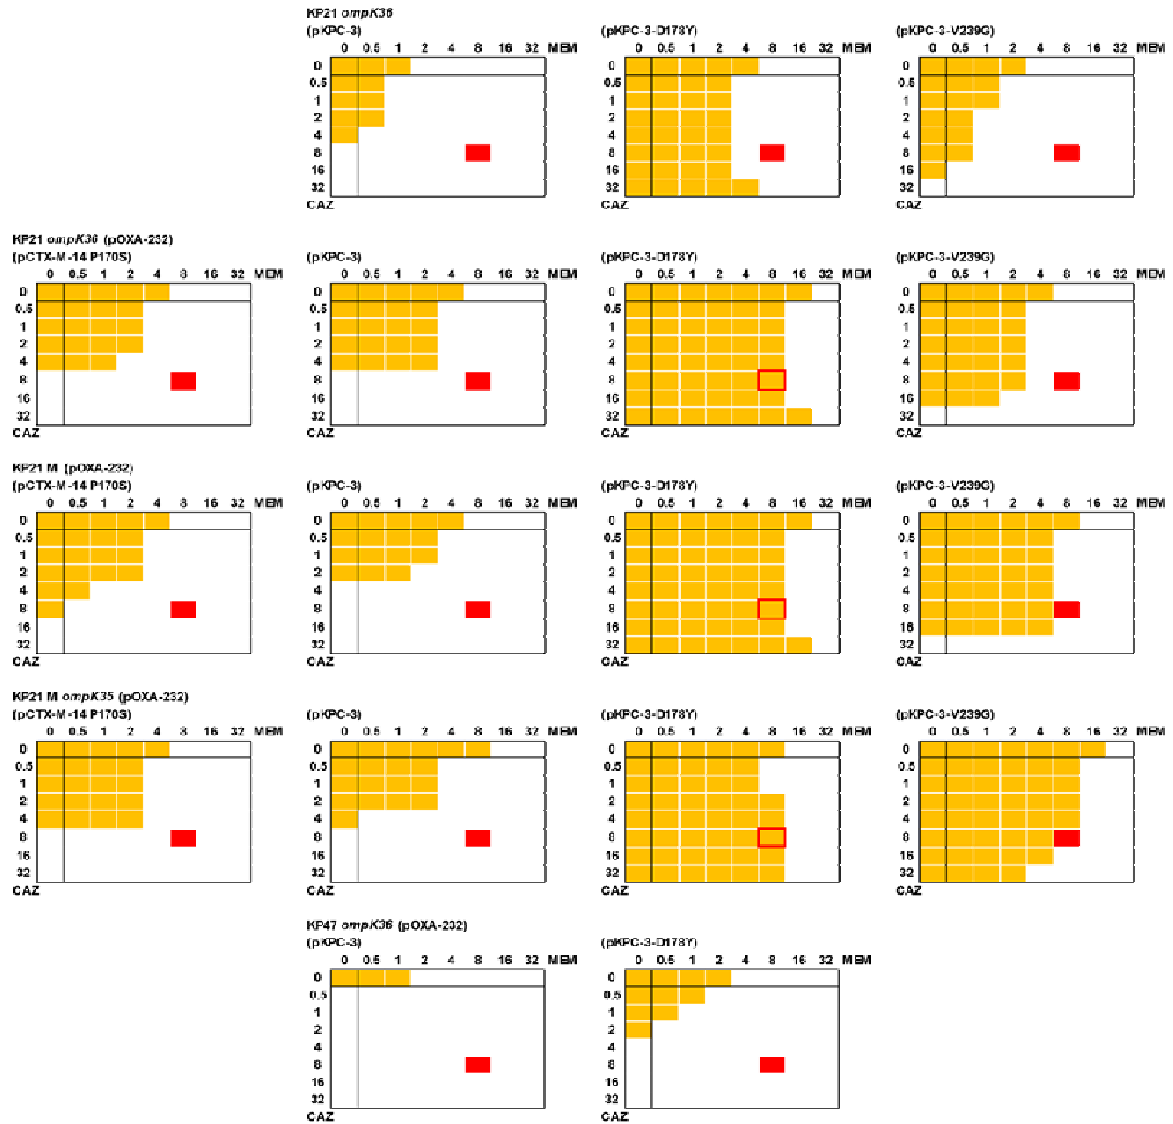

409  
410

411 **References**

- 412 1. WHO. Global priority list of antibiotic resistant bacteria to guide research, discovery and  
413 development of new antibiotics. 2017.
- 414 2. Veleba M, Higgins PG, Gonzalez G, Seifert H, Schneiders T. 2012. Characterization of  
415 RarA, a novel AraC family multidrug resistance regulator in *Klebsiella pneumoniae*.  
416 Antimicrob Agents Chemother 56:4450-4458.
- 417 3. Wan Nur Ismah WAK, Takebayashi Y, Findlay J, Heesom KJ, Avison MB. 2018. Impact  
418 of OqxR loss of function on the envelope proteome of *Klebsiella pneumoniae* and  
419 susceptibility to antimicrobials. J Antimicrob Chemother 73:2990-2996.
- 420 4. Hentschke M, Wolters M, Sobottka I, Rohde H, Aepfelbacher M. 2010. *ramR* mutations  
421 in clinical isolates of *Klebsiella pneumoniae* with reduced susceptibility to tigecycline.  
422 Antimicrob Agents Chemother 54:2720-2723.
- 423 5. Jiménez-Castellanos JC, Wan Nur Ismah WAK, Takebayashi Y, Findlay J, Schneiders T,  
424 Heesom KJ, Avison MB. 2018. Envelope proteome changes driven by RamA  
425 overproduction in *Klebsiella pneumoniae* that enhance acquired  $\beta$ -lactam resistance. J  
426 Antimicrob Chemother 73:88-94.
- 427 6. Findlay J, Hamouda A, Dancer SJ, Amyes SG. 2012. Rapid acquisition of decreased  
428 carbapenem susceptibility in a strain of *Klebsiella pneumoniae* arising during  
429 meropenem therapy. Clin Microbiol Infect 18:140-146.
- 430 7. Holt KE, Wertheim H, Zadoks RN, Baker S, Whitehouse CA, Dance D, Jenney A,  
431 Connor TR, Hsu LY, Severin J, Brisse S, Cao H, Wilksch J, Gorrie C, Schultz MB,  
432 Edwards DJ, Nguyen KV, Nguyen TV, Dao TT, Mensink M, Minh VL, Nhu NT, Schultz  
433 C, Kuntaman K, Newton PN, Moore CE, Strugnell RA, Thomson NR. 2015. Genomic  
434 analysis of diversity, population structure, virulence, and antimicrobial resistance in  
435 *Klebsiella pneumoniae*, an urgent threat to public health. Proc Natl Acad Sci U S A  
436 112:E3574-3581.



- 437 8. Cantón R, González-Alba JM, Galán JC. 2012. CTX-M Enzymes: Origin and Diffusion.  
438 Front Microbiol 3:110.
- 439 9. Kitchel B, Rasheed JK, Patel JB, Srinivasan A, Navon-Venezia S, Carmeli Y, Brolund A,  
440 Giske CG. 2009. Molecular epidemiology of KPC-producing *Klebsiella pneumoniae*  
441 isolates in the United States: clonal expansion of multilocus sequence type 258.  
442 Antimicrob Agents Chemother 53:3365-3370.
- 443 10. Poirel L, Potron A, Nordmann P. 2012. OXA-48-like carbapenemases: the phantom  
444 menace. J Antimicrob Chemother 67:1597-1606.
- 445 11. Ehmann DE, Jahić H, Ross PL, Gu RF, Hu J, Kern G, Walkup GK, Fisher SL. 2012.  
446 Avibactam is a covalent, reversible, non- $\beta$ -lactam  $\beta$ -lactamase inhibitor. Proc Natl Acad  
447 Sci U S A 109:11663-11668.
- 448 12. Castón JJ, Lacort-Peralta I, Martín-Dávila P, Loeches B, Tabares S, Temkin L, Torre-  
449 Cisneros J, Paño-Pardo JR. 2017. Clinical efficacy of ceftazidime/avibactam versus  
450 other active agents for the treatment of bacteremia due to carbapenemase-producing  
451 Enterobacteriaceae in hematologic patients. Int J Infect Dis 59:118-123.
- 452 13. Wang DY, Abboud MI, Markoulides MS, Brem J, Schofield CJ. 2016. The road to  
453 avibactam: the first clinically useful non- $\beta$ -lactam working somewhat like a  $\beta$ -lactam.  
454 Future Med Chem 8:1063-1084.
- 455 14. Shields RK, Chen L, Cheng S, Chavda KD, Press EG, Snyder A, Pandey R, Doi Y,  
456 Kreiswirth BN, Nguyen MH, Clancy CJ. 2017. Emergence of ceftazidime-avibactam  
457 resistance due to plasmid-borne *bla*<sub>KPC-3</sub> mutations during treatment of carbapenem-  
458 resistant *Klebsiella pneumoniae* infections. Antimicrob Agents Chemother 61:e02097-16.
- 459 15. Woodford N, Tierno PM Jr, Young K, Tysall L, Palepou MF, Ward E, Painter RE, Suber  
460 DF, Shungu D, Silver LL, Inglima K, Kornblum J, Livermore DM. 2004. Outbreak of  
461 *Klebsiella pneumoniae* producing a new carbapenem-hydrolyzing class A  $\beta$ -lactamase,  
462 KPC-3, in a New York Medical Center. Antimicrob Agents Chemother 48:4793-4799.
- 463 16. Both A, Büttner H, Huang J, Perbandt M, Belmar Campos C, Christner M, Maurer FP,  
464 Kluge S, König C, Aepfelbacher M, Wichmann D, Rohde H. 2017. Emergence of

- 465 ceftazidime/avibactam non-susceptibility in an MDR *Klebsiella pneumoniae* isolate. J  
466 Antimicrob Chemother 72:2483-2488.
- 467 17. Hecker SJ, Reddy KR, Totrov M, Hirst GC, Lomovskaya O, Griffith DC, King P,  
468 Tsivkovski R, Sun D, Sabet M, Tarazi Z, Clifton MC, Atkins K, Raymond A, Potts KT,  
469 Abendroth J, Boyer SH, Loutit JS, Morgan EE, Durso S, Dudley MN. 2015. Discovery of  
470 a cyclic boronic acid  $\beta$ -lactamase inhibitor (RPX7009) with utility vs class A serine  
471 carbapenemases. J Med Chem 58:3682-3692.
- 472 18. Lomovskaya O, Sun D, Rubio-Aparicio D, Nelson K, Tsivkovski R, Griffith DC, Dudley  
473 MN. 2017. Vaborbactam: spectrum of  $\beta$ -lactamase inhibition and impact of resistance  
474 mechanisms on activity in Enterobacteriaceae. Antimicrob Agents Chemother  
475 61:e01443-17.
- 476 19. Sun D, Rubio-Aparicio D, Nelson K, Dudley MN, Lomovskaya O. 2017. Meropenem-  
477 vaborbactam resistance selection, resistance prevention, and molecular mechanisms in  
478 mutants of KPC-producing *Klebsiella pneumoniae*. Antimicrob Agents Chemother  
479 61:e01694-17.
- 480 20. Pogue JM, Bonomo RA, Kaye KS. 2019. Ceftazidime/avibactam,  
481 meropenem/vaborbactam, or both? Clinical and formulary considerations. Clin Infect Dis  
482 68:519-524.
- 483 21. Athans V, Neuner EA, Hassouna H, Richter SS, Keller G, Castanheira M, Brizendine KD,  
484 Mathers AJ. 2018. Meropenem-vaborbactam as salvage therapy for ceftazidime-  
485 avibactam-resistant *Klebsiella pneumoniae* bacteremia and abscess in a liver transplant  
486 recipient. Antimicrob Agents Chemother 63:e01551-18.
- 487 22. Doménech-Sánchez A, Martínez-Martínez L, Hernández-Allés S, del Carmen Conejo M,  
488 Pascual A, Tomás JM, Albertí S, Benedí VJ. 2003. Role of *Klebsiella pneumoniae*  
489 OmpK35 porin in antimicrobial resistance. Antimicrob Agents Chemother 47:3332-3335.
- 490 23. Martínez-Martínez L. 2008. Extended-spectrum  $\beta$ -lactamases and the permeability  
491 barrier. Clin Microbiol Infect 14 Suppl 1:82-89.

- 492 24. Hernández-Allés S, Conejo Md, Pascual A, Tomás JM, Benedí VJ, Martínez-Martínez L.  
493 2000. Relationship between outer membrane alterations and susceptibility to  
494 antimicrobial agents in isogenic strains of *Klebsiella pneumoniae*. J Antimicrob  
495 Chemother 46:273-277.
- 496 25. Hamzaoui Z, Ocampo-Sosa A, Fernandez Martinez M, Landolsi S, Ferjani S, Maamar E,  
497 Saidani M, Slim A, Martinez-Martinez L, Boutiba-Ben Boubaker I. 2018. Role of  
498 association of OmpK35 and OmpK36 alteration and *bla*ESBL and/or *bla*AmpC genes in  
499 conferring carbapenem resistance among non-carbapenemase-producing *Klebsiella*  
500 *pneumoniae*. Int J Antimicrob Agents 52:898-905.
- 501 26. Potron A, Rondinaud E, Poirel L, Belmonte O, Boyer S, Camiade S, Nordmann P. 2013.  
502 Genetic and biochemical characterisation of OXA-232, a carbapenem-hydrolysing class  
503 D  $\beta$ -lactamase from Enterobacteriaceae. Int J Antimicrob Agents 41:325-329.
- 504 27. Jiménez-Castellanos JC, Wan Nur Ismah WAK, Takebayashi Y, Findlay J, Schneiders T,  
505 Heesom KJ, Avison MB. 2018. Envelope proteome changes driven by RamA  
506 overproduction in *Klebsiella pneumoniae* that enhance acquired  $\beta$ -lactam resistance. J  
507 Antimicrob Chemother 73:88-94.
- 508 28. Pfaller MA, Huband MD, Mendes RE, Flamm RK, Castanheira M. 2018. In vitro activity  
509 of meropenem/vaborbactam and characterisation of carbapenem resistance  
510 mechanisms among carbapenem-resistant Enterobacteriaceae from the 2015  
511 meropenem/vaborbactam surveillance programme. Int J Antimicrob Agents 52:144-150.
- 512 29. Wan Nur Ismah WAK, Takebayashi Y, Findlay J, Heesom KJ, Jiménez-Castellanos JC,  
513 Zhang J, Graham L, Bowker K, Williams OM, MacGowan AP, Avison MB. 2018.  
514 Prediction of fluoroquinolone susceptibility directly from whole-genome sequence data by  
515 using liquid chromatography-tandem mass spectrometry to identify mutant genotypes.  
516 Antimicrob Agents Chemother 62:e01814-17.
- 517 30. Coppi M, Di Pilato V, Monaco F, Giani T, Conaldi PG, Rossolini GM. 2020. Ceftazidime-  
518 avibactam resistance associated with increased *bla* KPC-3 gene copy number mediated

- 519 by pKpQIL plasmid derivatives in ST258 *Klebsiella pneumoniae*. Antimicrob Agents  
520 Chemother. pii: AAC.01816-19. doi: 10.1128/AAC.01816-19. [Epub ahead of print].
- 521 31. George AM, Hall RM, Stokes HW. 1995. Multidrug resistance in *Klebsiella pneumoniae*:  
522 a novel gene, *ramA*, confers a multidrug resistance phenotype in *Escherichia coli*.  
523 Microbiology 141:1909–1920.
- 524 32. Alexeyev MF. 1999. The pKNOCK series of broad-host-range mobilizable suicide  
525 vectors for gene knockout and targeted DNA insertion into the chromosome of gram-  
526 negative bacteria. BioTechniques 26:824-828.
- 527 33. Clinical and Laboratory Standards Institute. 2015. M07-A10. Methods for dilution  
528 antimicrobial susceptibility tests for bacteria that grow aerobically; approved standard,  
529 10th ed. Clinical and Laboratory Standards Institute, Wayne, PA.
- 530 34. Clinical and Laboratory Standards Institute. 2019. M100-S29. Performance standards for  
531 antimicrobial susceptibility testing; twenty-ninth informational supplement. An  
532 informational supplement for global application developed through the Clinical and  
533 Laboratory Standards Institute consensus process. Clinical and Laboratory Standards  
534 Institute, Wayne, PA.
- 535 35. Silva JC, Gorenstein MV, Li GZ, Vissers JPC, Geromanos SG. 2006. Absolute  
536 quantification of proteins by LCMSE - a virtue of parallel MS acquisition. Mol Cell  
537 Proteomics 5:144-156.
- 538 36. Bolger AM, Lohse M, Usadel B. 2014. Trimmomatic: a flexible trimmer for Illumina  
539 sequence data. Bioinformatics 30:2114-2120.
- 540 37. Darling AE, Mau B, Perna NT. 2010. progressiveMauve: multiple genome alignment with  
541 gene gain, loss and rearrangement. PloS One 5:e11147.
- 542 38. Findlay J, Gould VC, North P, Bowker KE, Williams MO, MacGowan AP, Avison MB.  
543 2020. Characterization of cefotaxime-resistant urinary *Escherichia coli* from primary care  
544 in South-West England 2017-18. J Antimicrob Chemother 75:65-71.
- 545 39. Takebayashi Y, Wan Nur Ismah WHK, Findlay J, Heesom KJ, Zhang J, Williams OM,  
546 MacGowan AP, Avison MB. 2017. Prediction of cephalosporin and carbapenem

- 547       susceptibility in multi-drug resistant Gram-negative bacteria using liquid chromatography-  
548       tandem mass spectrometry. BioRxiv 138594; doi: <https://doi.org/10.1101/138594>.
- 549   40. Papagiannitsis CC, Di Pilato V, Giani T, Giakkoupi P, Riccobono E, Landini G, Miriagou  
550       V, Vatopoulos AC, Rossolini GM. 2016. Characterization of KPC-encoding plasmids from  
551       two endemic settings, Greece and Italy. J Antimicrob Chemother. 71:2824-30.
- 552   41. Göttig S, Gruber TM, Stecher B, Wichelhaus TA, Kempf VA. 2015. In vivo horizontal  
553       gene transfer of the carbapenemase OXA-48 during a nosocomial outbreak. Clin Infect  
554       Dis. 60:1808-15.
- 555   42. Spagnolo F, Rinaldi C, Sajorda DR, Dykhuizen DE. 2015. Evolution of Resistance to  
556       Continuously Increasing Streptomycin Concentrations in Populations of *Escherichia coli*.  
557       Antimicrob Agents Chemother. 60:1336-42.
- 558   43. Baquero MR1, Nilsson AI, Turrientes Mdel C, Sandvang D, Galán JC, Martínez JL,  
559       Frimodt-Møller N, Baquero F, Andersson DI. 2004. Polymorphic mutation frequencies in  
560       *Escherichia coli*: emergence of weak mutators in clinical isolates. J Bacteriol. 186:5538-  
561       42.
- 562   44. Hottes AK, Freddolino PL, Khare A, Donnell ZN, Liu JC, Tavazoie S. 2013. Bacterial  
563       adaptation through loss of function. PLoS Genet. 9:e1003617.
